# Supplementary material
Source: PubMed Central journal article supplement (PMC2427229)
Supplement: mmc1.pdf [file mmc1.pdf]

Supplemental Data

Differential Expression of *PTEN*-Targeting MicroRNAs *miR-19a* and *miR-21* in Cowden Syndrome

Marcus G. Pezzolesi, Petra Platzer, Kristin A. Waite, and Charis Eng

Figure S1. PTEN Protein Levels in Patient and Control Samples

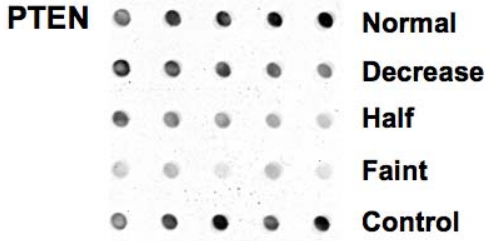

Whole cell protein lysates from control or patient lymphoblastoid lines were applied to nitrocellulose with a dotblot apparatus (Bio-Rad, Hercules, CA, USA). Patient protein lysates were isolated from immortalized LBCLs by the Genomic Medicine Biorepository, and protein concentrations were determined via the BCA assay, with BSA as a standard. Thirty micrograms of protein was applied to nitrocellulose with a dotblot apparatus, and equal protein loading was confirmed by staining of the nitrocellulose blots with Ponceau S. Nitrocellulose blots were then subjected to western blot analysis with  $\alpha$ -PTEN (monoclonal antibody clone 6H2.1 [Cascade Biosciences, Portland, OR, USA]) at 1:1000 dilution, and they were then incubated with appropriate secondary antibody as previously described. Proteins were visualized with enhanced chemiluminescence. The series of dotblot western blots illustrate the PTEN protein levels of *PTEN*-mutation-negative patients with Cowden or Cowden-like syndrome and those of the control group.

“Normal” indicates normal PTEN protein levels.

“Decreased” indicates decreased PTEN protein levels relative to control levels.

“Half” indicates PTEN protein levels that are half those of control levels.

“Faint” indicates faint PTEN protein levels relative to control levels.

“Control” indicates the protein levels of control samples.

Table S1. Clinical Features, PTEN Protein\*, and Relative *PTEN* mRNA, *miR-19a*, and *miR-21* Expression among Patients with R130X, R233X, or R335X Mutations

| Mutation/<br>Sample | Gender | Age at<br>Diagnosis | Phenotype | PTEN<br>Protein<br>Expression | <i>PTEN</i><br>Transcript<br>Expression | <i>miR-19a</i><br>Expression | <i>miR-21</i><br>Expression | Clinical Manifestations                                                                           |
|---------------------|--------|---------------------|-----------|-------------------------------|-----------------------------------------|------------------------------|-----------------------------|---------------------------------------------------------------------------------------------------|
| <b>R130X</b>        |        |                     |           |                               |                                         |                              |                             |                                                                                                   |
| 0047-01             | M      | 46                  | CS        | Faint                         | 0.893                                   | 1.567                        | 2.128                       | Macrocephaly, trichilemmomas, acral keratoses, papillomatous papules, lipomas, GI cancer          |
| 0491-01             | F      | 70                  | CS        | Normal                        | 0.870                                   | 1.510                        | 1.181                       | Macrocephaly, fibrocystic breast disease, breast cancer, endometrial fibroids, endometrial cancer |
| 0521-01             | M      | 15                  | CS        | Decrease                      | 0.805                                   | 1.880                        | 2.937                       | Macrocephaly, LDD, benign thyroid, multiple papules on lips, tongue, and esophagus                |
| 0857-01             | F      | 63                  | CS        | Half                          | 0.604                                   | 1.876                        | 1.381                       | Macrocephaly, benign thyroid, colon polyps, GU abnormality                                        |
| 1111-01             | M      | 56                  | CS        | Half                          | 1.020                                   | 3.900                        | 2.532                       | Macrocephaly, LDD, thyroid cancer                                                                 |

AJHG, Volume 82

|              |   |    |         |          |       |       |       |                                                                                                                                                                     |
|--------------|---|----|---------|----------|-------|-------|-------|---------------------------------------------------------------------------------------------------------------------------------------------------------------------|
| 1432-01      | M | 59 | CS      | Normal   | 0.637 | 0.829 | 0.918 | Macrocephaly, lipomas, trichilemmomas, papillomatous papules, benign thyroid                                                                                        |
| 4396-01      | F | 47 | CS      | Normal   | 0.817 | 1.231 | 0.646 | Macrocephaly, lipomas, benign thyroid, breast cancer, endometrial fibroids                                                                                          |
| 11578-01     | F | 61 | CS      | Half     | 0.634 | 1.861 | 1.447 | Macrocephaly, papillomatous papules, breast cancer, hemangioma, lipomas, benign thyroid, endometrial fibroids                                                       |
| 12644-01     | F | 47 | CS      | Decrease | 0.828 | 1.456 | 1.502 | Macrocephaly, trichilemmomas, papillomatous papules, breast cancer, benign thyroid                                                                                  |
| 2381-01      | F | 2  | CSL     | Normal   | 0.984 | 1.158 | 1.271 | Macrocephaly, lipomas, developmental delay                                                                                                                          |
| 15413-01     | M | 50 | CS/BRRS | Decrease | 0.913 | 1.510 | 2.249 | Macrocephaly, papillomatous papules, lipomas, hemangioma, benign thyroid, LDD, pigmented macules on penis                                                           |
| 0268-01      | M | 9  | BRRS    | Normal   | 1.219 | 0.959 | 1.315 | Macrocephaly, lipomas, pigmented macules on penis                                                                                                                   |
| 4498-01      | M | 9  | BRRS    | Normal   | 0.932 | 1.016 | 1.006 | Macrocephaly, oral papillomatous papules, pigmented macules on penis                                                                                                |
| <b>R233X</b> |   |    |         |          |       |       |       |                                                                                                                                                                     |
| 12961-01     | F | 48 | CS      | Half     | 0.528 | 1.419 | 1.421 | Macrocephaly, trichilemmomas, papillomatous papules, acral keratoses, lipomas, hemangioma, thyroid cancer                                                           |
| 4026-01      | F | 3  | CSL     | Normal   | 0.514 | 1.696 | 1.625 | Macrocephaly, developmental delay                                                                                                                                   |
| 4389-01      | F | 40 | CSL     | Half     | 0.527 | 2.078 | 2.180 | Macrocephaly, breast cancer, lipomas                                                                                                                                |
| 17727-01     | F | 6  | CSL     | Decrease | 0.619 | 1.310 | 1.133 | Macrocephaly, lipomas, hemangioma, developmental delay                                                                                                              |
| 972-01       | M | 7  | BRRS    | Decrease | 0.602 | 1.443 | 1.028 | Macrocephaly, developmental delay, hemangioma                                                                                                                       |
| <b>R335X</b> |   |    |         |          |       |       |       |                                                                                                                                                                     |
| 1113-01      | F | 32 | CS      | Faint    | 1.275 | 1.073 | 1.235 | Macrocephaly, trichilemmomas, acral keratoses, lipomas, fibromas, breast cancer                                                                                     |
| 1194-01      | F | 60 | CS      | Faint    | 1.146 | 2.210 | 1.537 | Macrocephaly, papillomatous papules, lipomas, benign thyroid, developmental delay                                                                                   |
| 1495-01      | F | 50 | CS      | Decrease | 1.202 | 2.225 | 1.964 | Fibrocystic breast disease, papillomatous papules, lipomas, benign thyroid, endometrial fibroids                                                                    |
| 4292-01      | F | 56 | CS      | Half     | 1.381 | 0.463 | 0.950 | Fibrocystic breast disease, acral keratoses, lipomas, trichilemmomas, papillomatous papules, endometrial fibroids                                                   |
| 15394-01     | F | 50 | CS      | Decrease | 1.284 | 1.549 | 1.929 | Fibrocystic breast disease, trichilemmomas, papillomatous papules, lipomas, trichilemmomas, breast cancer, benign thyroid, endometrial cancer, endometrial fibroids |
| 16224-01     | M | 38 | CS      | Decrease | 1.661 | 1.628 | 1.609 | Macrocephaly, trichilemmomas, papillomatous papules, lipomas                                                                                                        |

*AJHG*, Volume 82

|          |   |    |      |          |       |       |       |                                                                                                          |
|----------|---|----|------|----------|-------|-------|-------|----------------------------------------------------------------------------------------------------------|
| 19885-01 | F | 10 | CS   | Decrease | 1.067 | 1.562 | 1.222 | Macrocephaly, acral keratoses, lipomas, hemangioma                                                       |
| 6230-01  | M | 39 | CSL  | Half     | 1.260 | 2.118 | 1.574 | Macrocephaly, lipomas                                                                                    |
| 0232-01  | M | 44 | BRRS | Normal   | 1.008 | 0.678 | 0.597 | Macrocephaly, trichilemmomas, papillomatous papules, lipomas, benign thyroid, pigmented macules on penis |
| 0531-01  | M | 1  | BRRS | Faint    | 1.333 | 0.762 | 1.107 | Macrocephaly, developmental delay                                                                        |

\*PTEN protein status “calls” are illustrated in Figure S1.
